# Supplementary material for: Multifunctional hyaluronic acid-derived carbon dots for self-targeted imaging-guided photodynamic therapy
Source: Royal Society of Chemistry journal article supplement (doi:10.1039/c8tb01957f), 2018-01-01
Supplement: c8tb01957f1.pdf [file c8tb01957f1.pdf]

## **Multifunctional hyaluronic acid-derived carbon dots for self-targeted imaging-guided photodynamic therapy**

Lizhen Zhang,<sup>ab</sup> Zhaoxing Lin,<sup>a</sup> Yunxiang Yu,<sup>a</sup> Bang-Ping Jiang,<sup>\*a</sup> Xing-Can Shen<sup>\*a</sup>

<sup>a</sup>State Key Laboratory for the Chemistry and Molecular Engineering of Medicinal Resources, School of Chemistry and Pharmaceutical Science, Guangxi Normal University, Guilin, 541004, P. R. China

<sup>b</sup>Guilin Normal College, Guilin, 541001, P. R. China

\*Xing-Can Shen. Tel: (+86) 773-5846273; E-mail: xcshen@mailbox.gxnu.edu.cn.

\*Bang-Ping Jiang. Tel: (+86) 773-5846273; E-mail:  
jiangbangping@mailbox.gxnu.edu.cn.

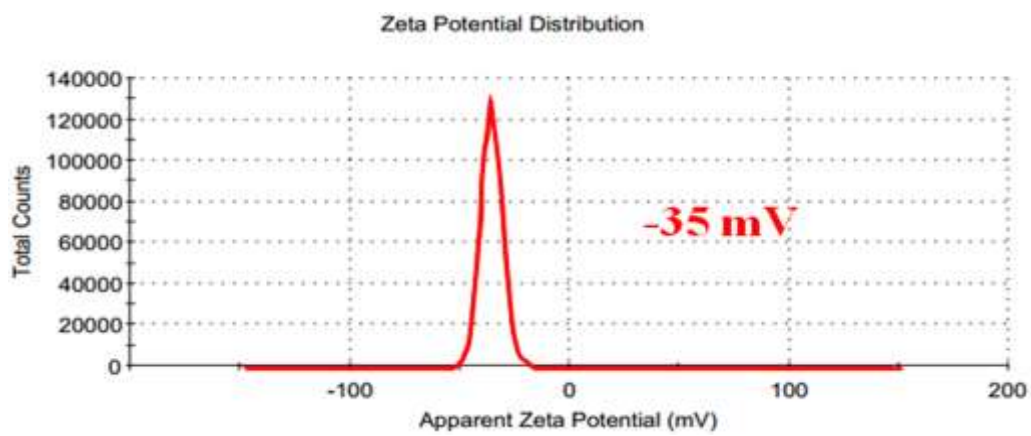

**Fig. S1** Surface charge of HA-CDs was measured by zeta potential.

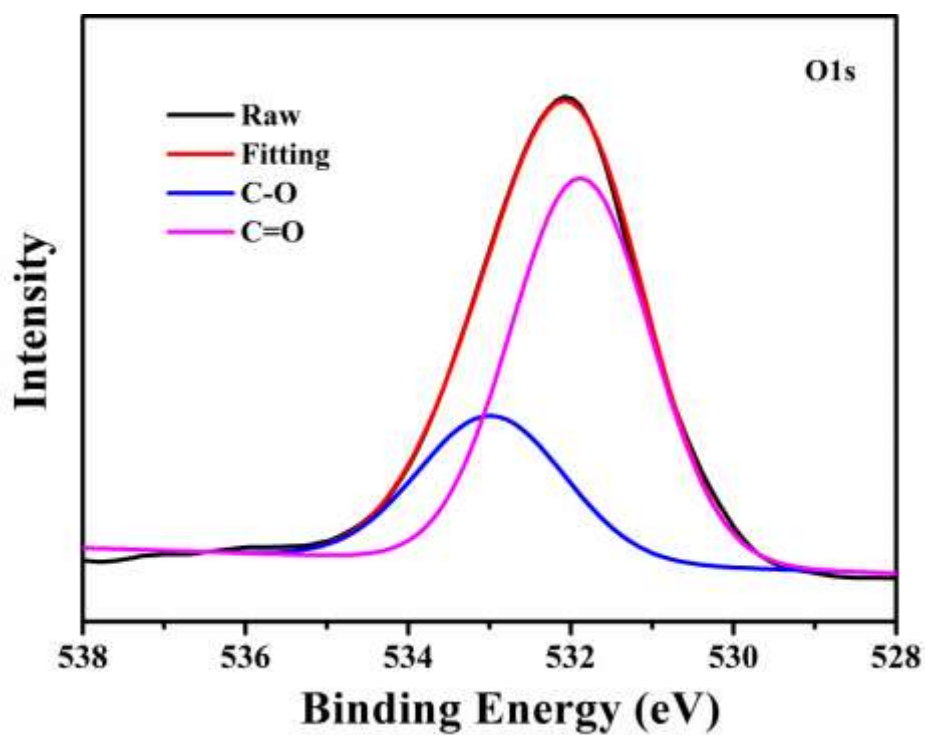

Fig. S2 High-resolution O1s XPS spectra of HA-CDs.

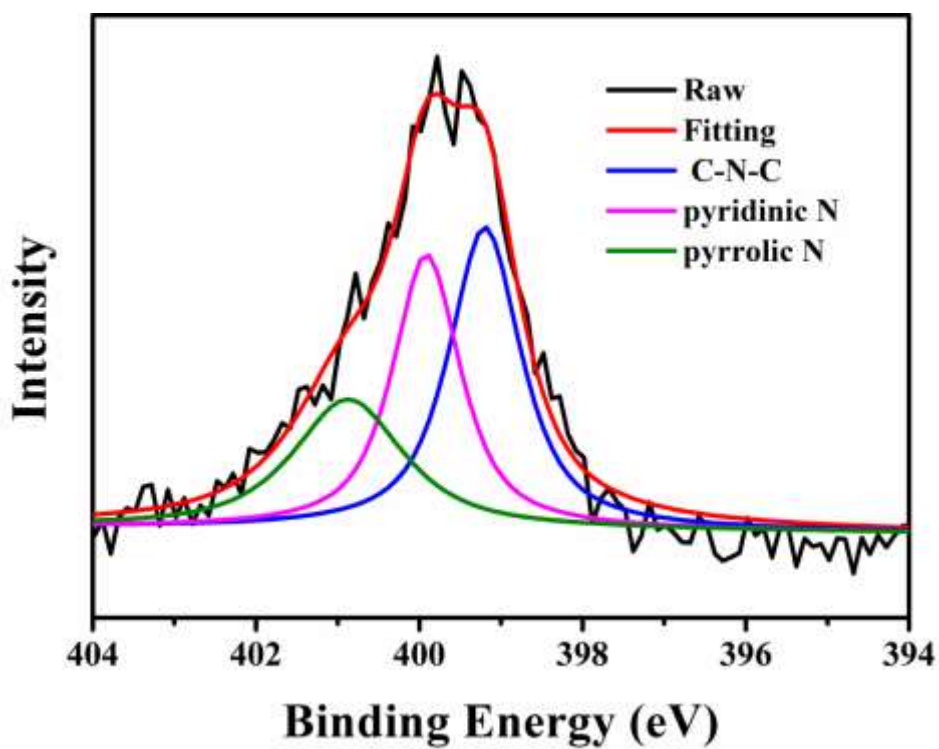

Fig. S3 High-resolution N1s XPS spectra of HA-CDs.

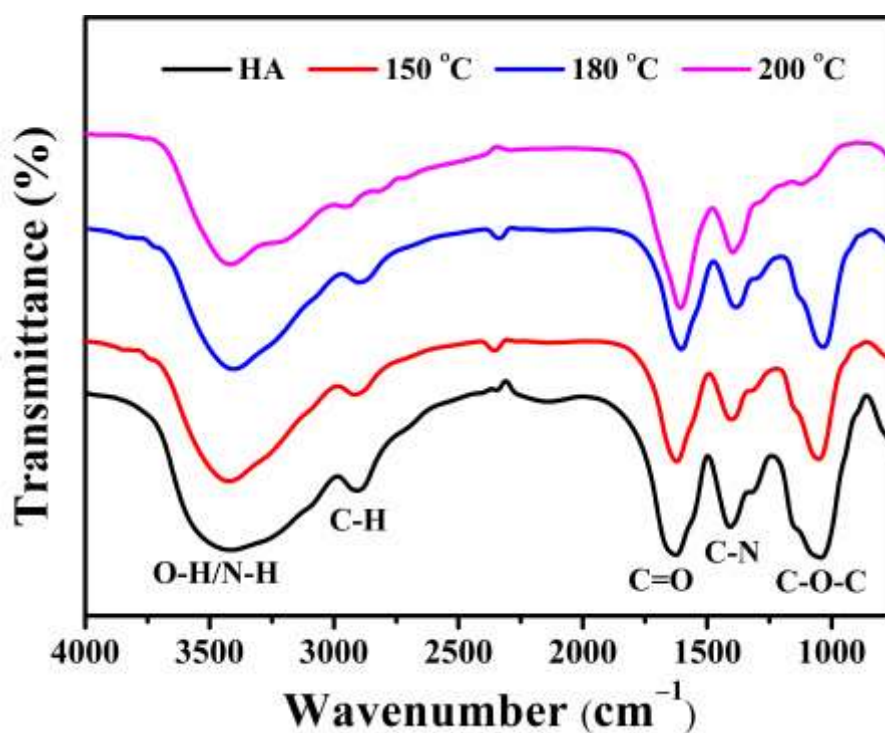

**Fig. S4** FT-IR spectra of HA and HA-CDs prepared at different temperatures (150 °C, 180 °C and 200 °C) in water, respectively.

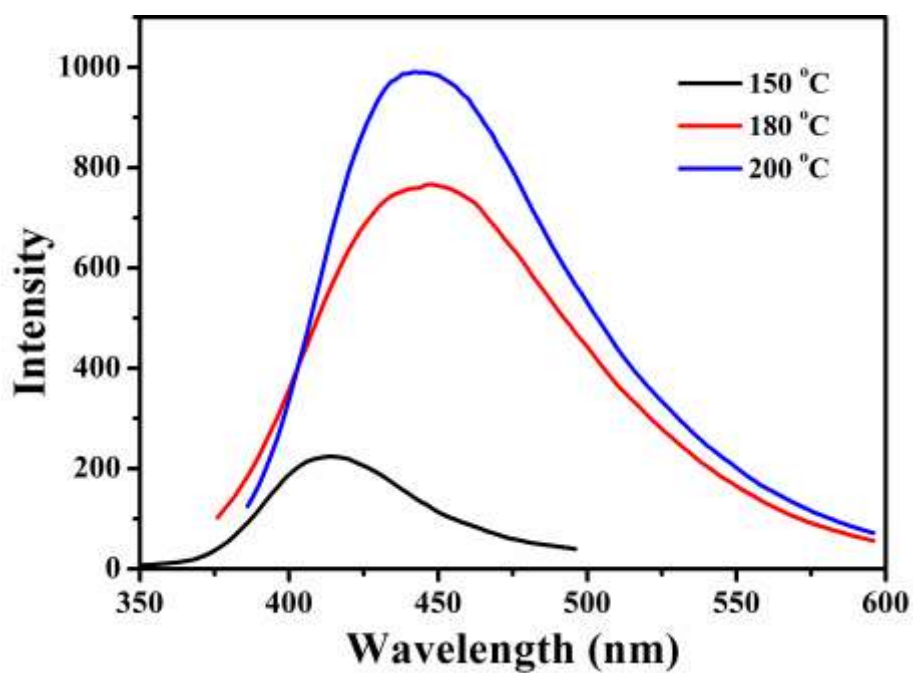

**Fig. S5** PL emission spectra of the aqueous solutions of the HA-CDs prepared at different temperatures (150 °C, 180 °C and 200 °C), respectively.

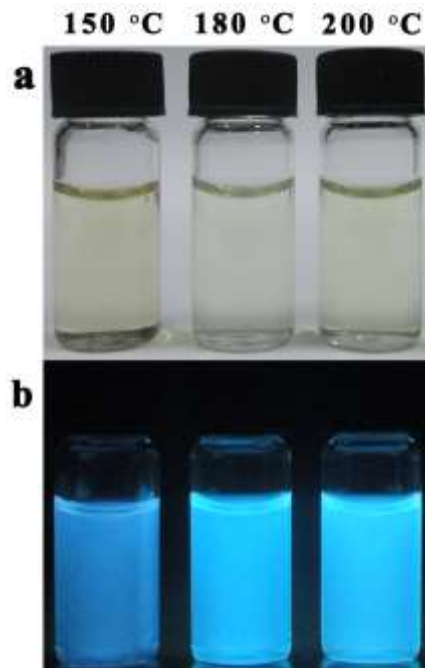

**Fig. S6** Photographs of the aqueous solutions of the HA-CDs prepared at different temperatures (150 °C, 180 °C and 200 °C) under visible light (a) and 365-nm UV irradiation (b).

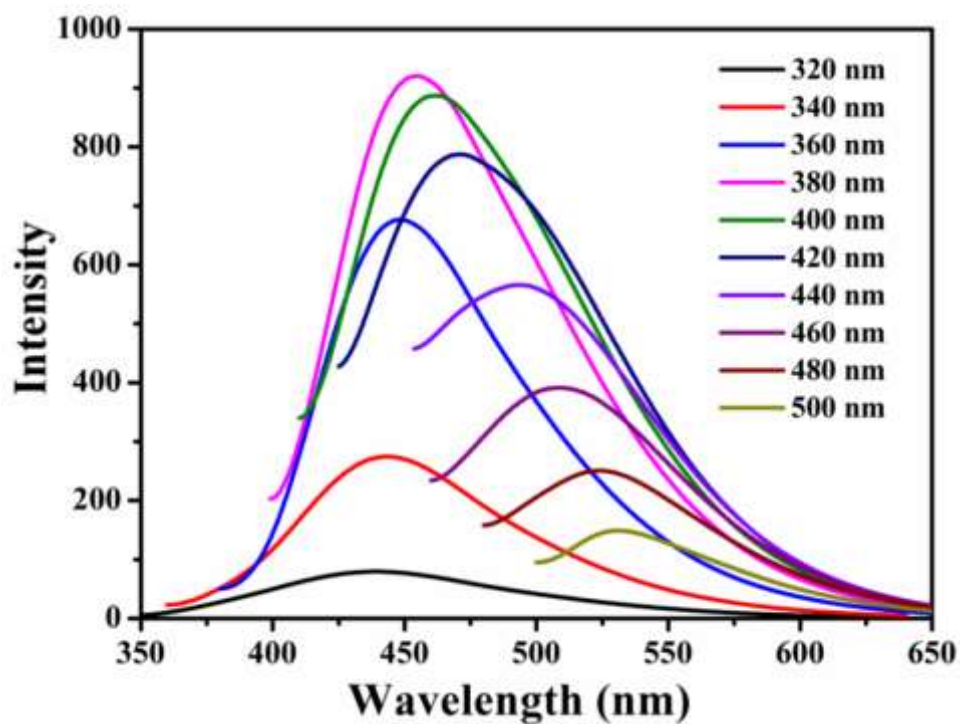

**Fig. S7** PL emission spectra of HA-CDs with different excitation wavelengths from

320 to 500 nm.

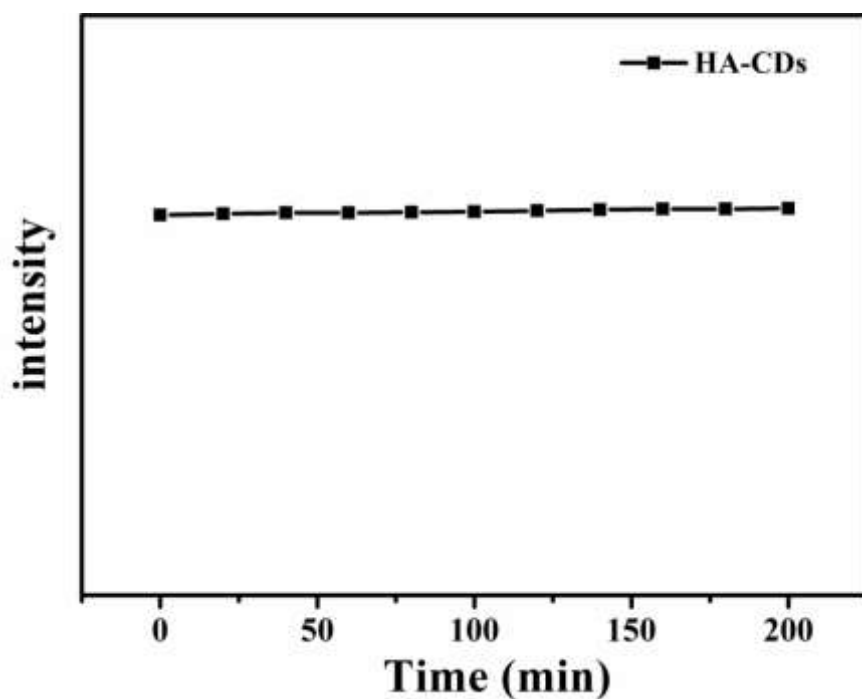

**Fig. S8** Effect of illumination time under 365-nm UV light on the fluorescence intensity.

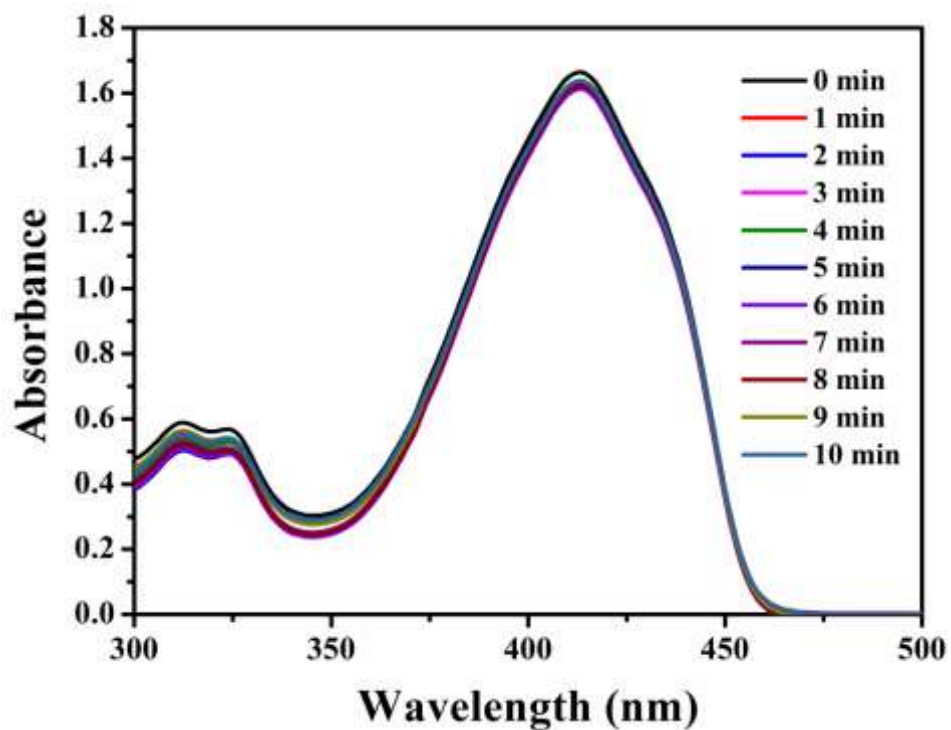

**Fig. S9** UV-Vis spectra of DPBF for different times without laser irradiation.

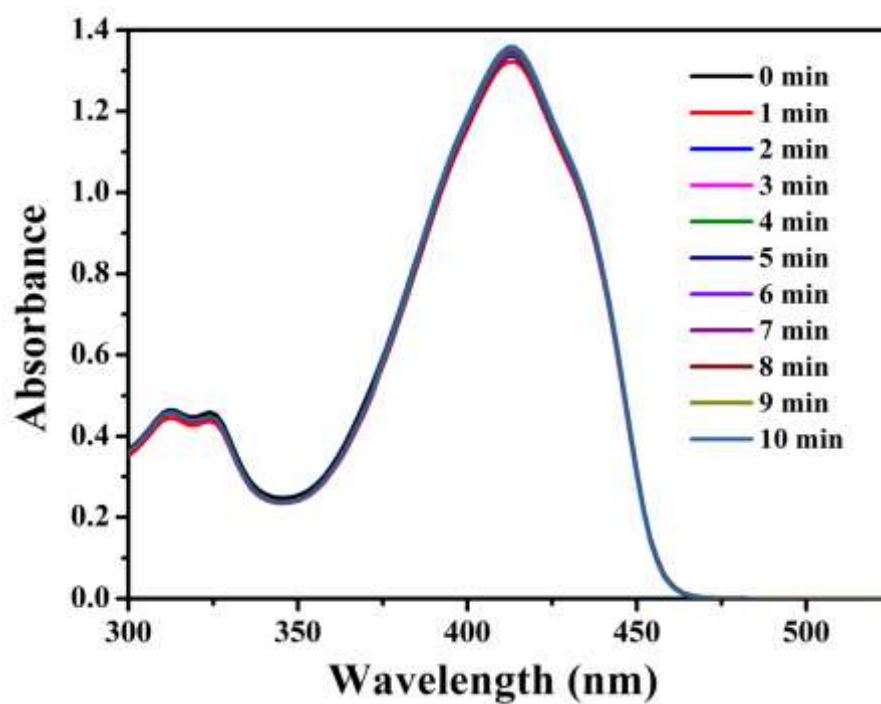

**Fig. S10** UV-Vis spectra of DPBF for different irradiation times by a 650-nm ( $1 \text{ W cm}^{-2}$ ) laser.

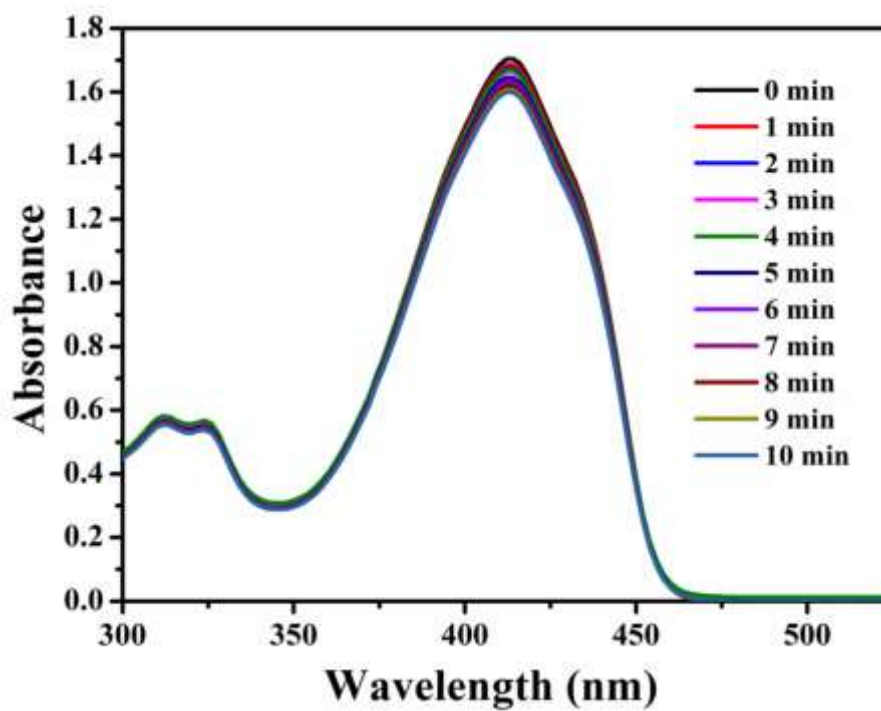

**Fig. S11** UV-Vis spectra of DPBF+HA-CDs for different times without laser irradiation.

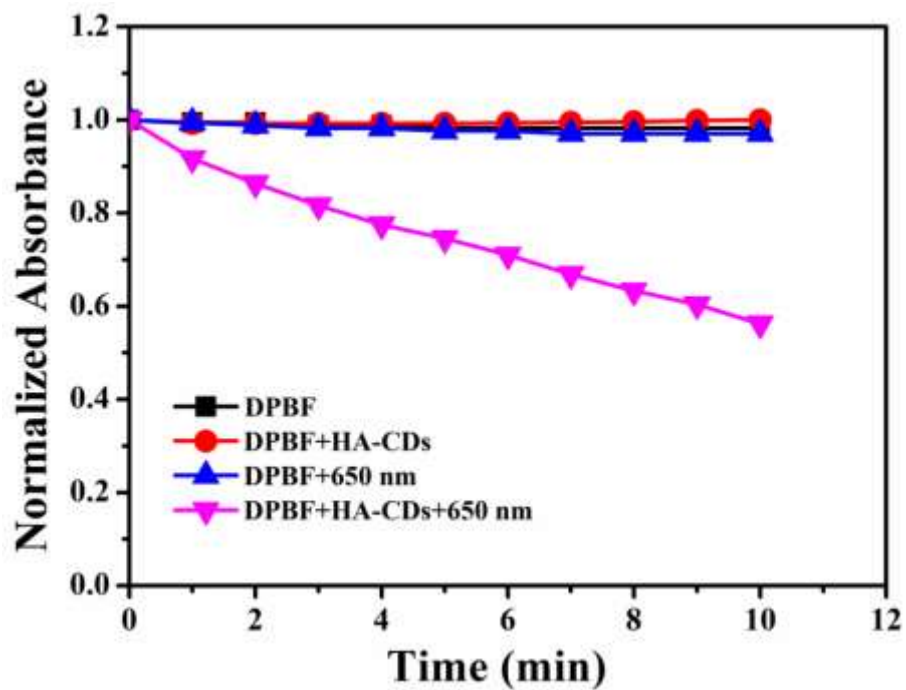

**Fig. S12** A comparison of DPBF photo-degradations under the irradiation of 650-nm laser.

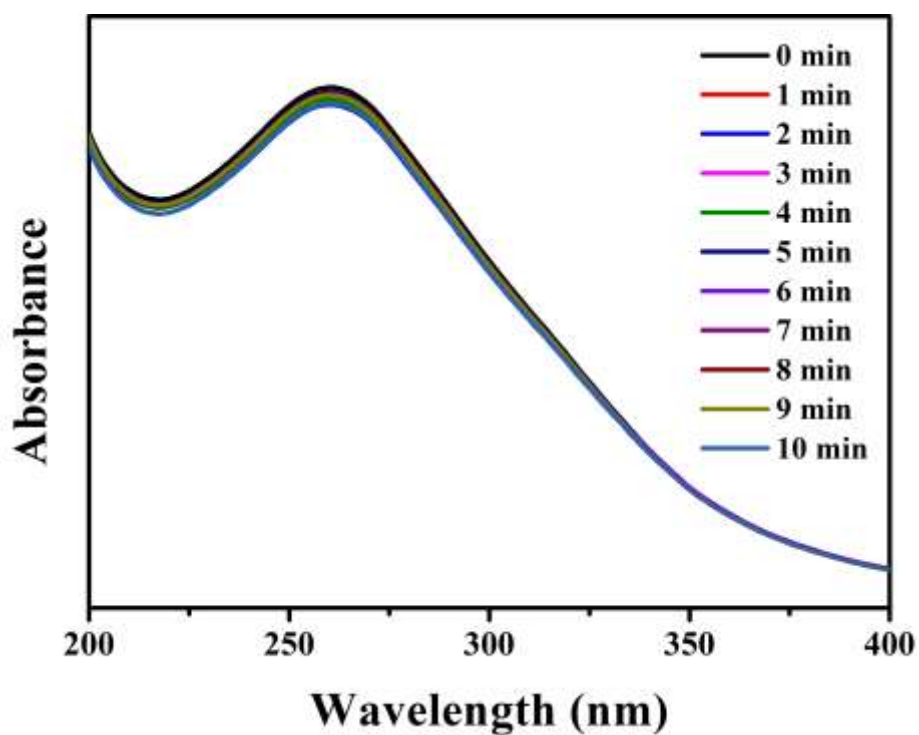

**Fig. S13** UV-Vis spectra of NBT for different irradiation times by a 650-nm (1 W  $\text{cm}^{-2}$ ) laser.



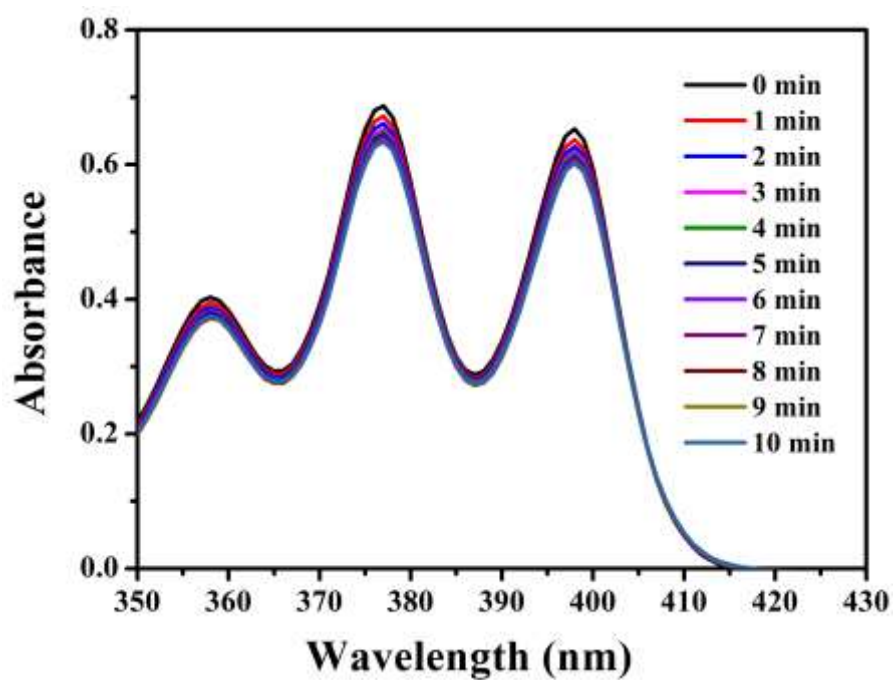

**Fig. S14** UV-Vis spectra of Na<sub>2</sub>-ADPA + HA-CDs for different irradiation times by a 650-nm (1 W cm<sup>-2</sup>) laser.

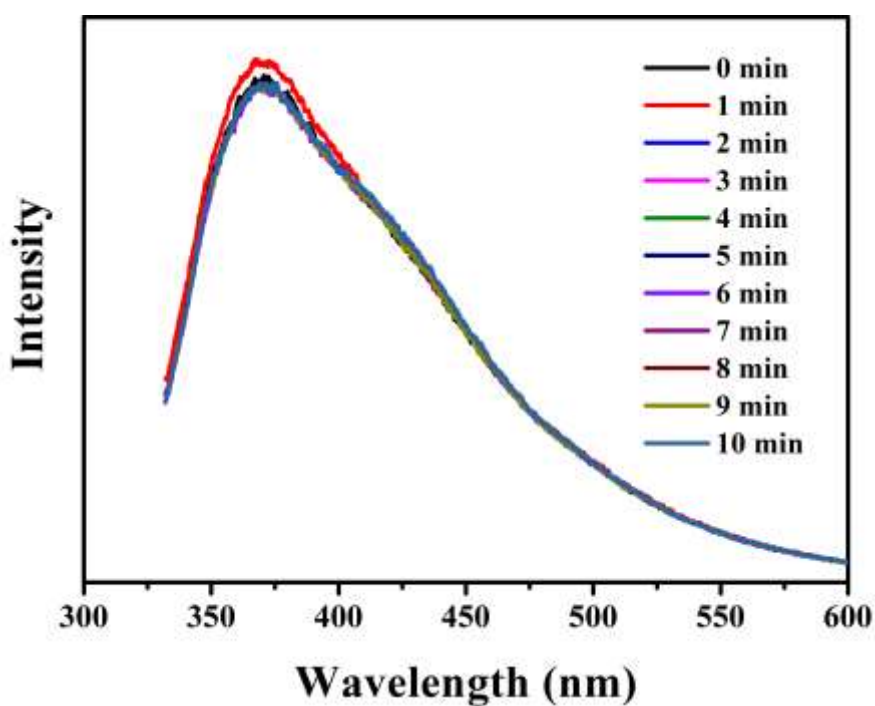

**Fig. S15** PL. spectra of TA + HA-CDs with different irradiation times by a 650-nm (1 W cm<sup>-2</sup>) laser.

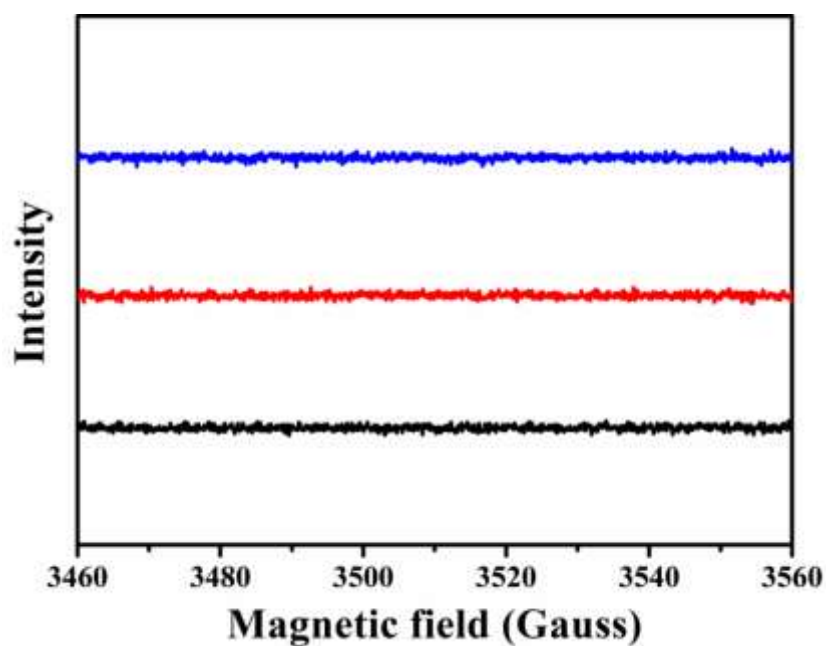

**Fig. S16** ESR spectra of TEMP with laser irradiation (black line), TEMP and HA-CDs without laser irradiation (red line), TEMP and HA-CDs with laser irradiation (blue line). Samples irradiated with 650-nm laser ( $1 \text{ W cm}^{-2}$ ).

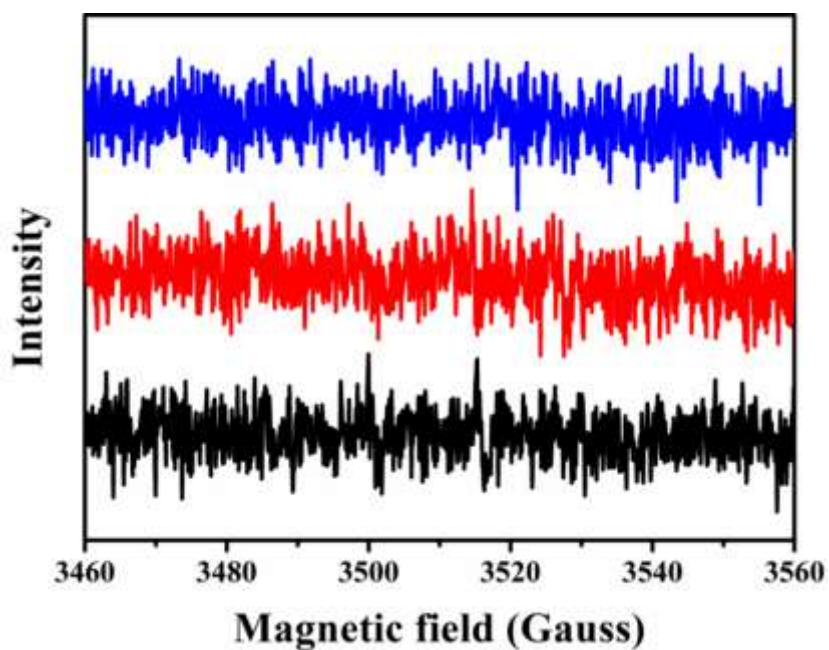

**Fig. S17** ESR spectra of DMPO with laser irradiation (black line), DMPO and HA-CDs without laser irradiation (red line), DMPO and HA-CDs with laser irradiation (blue

line). Samples irradiated with 650-nm laser ( $1 \text{ W cm}^{-2}$ )

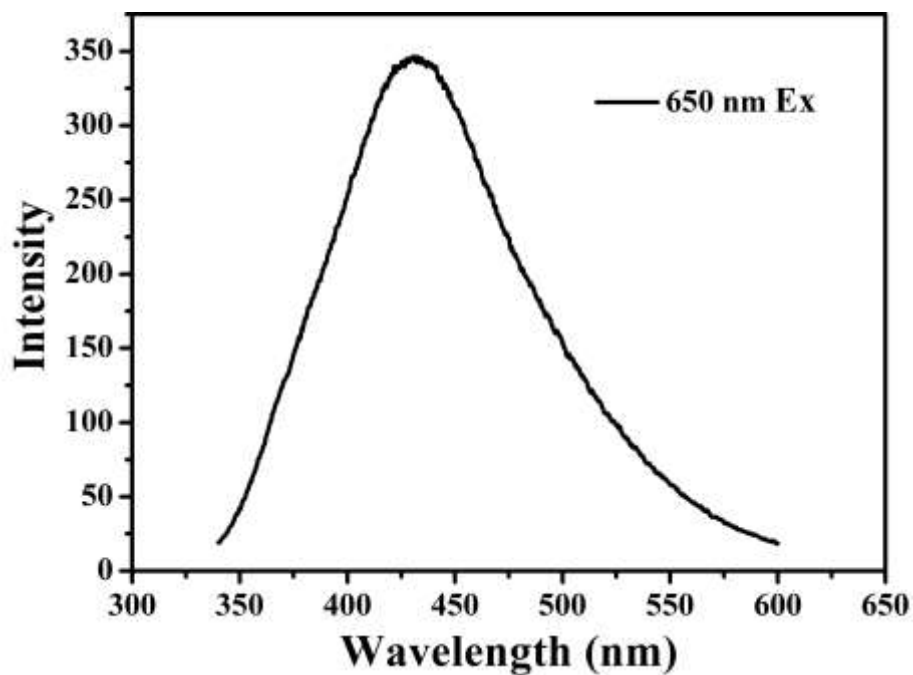

Fig. S18 PL emission spectra of HA-CDs at 650-nm excitation

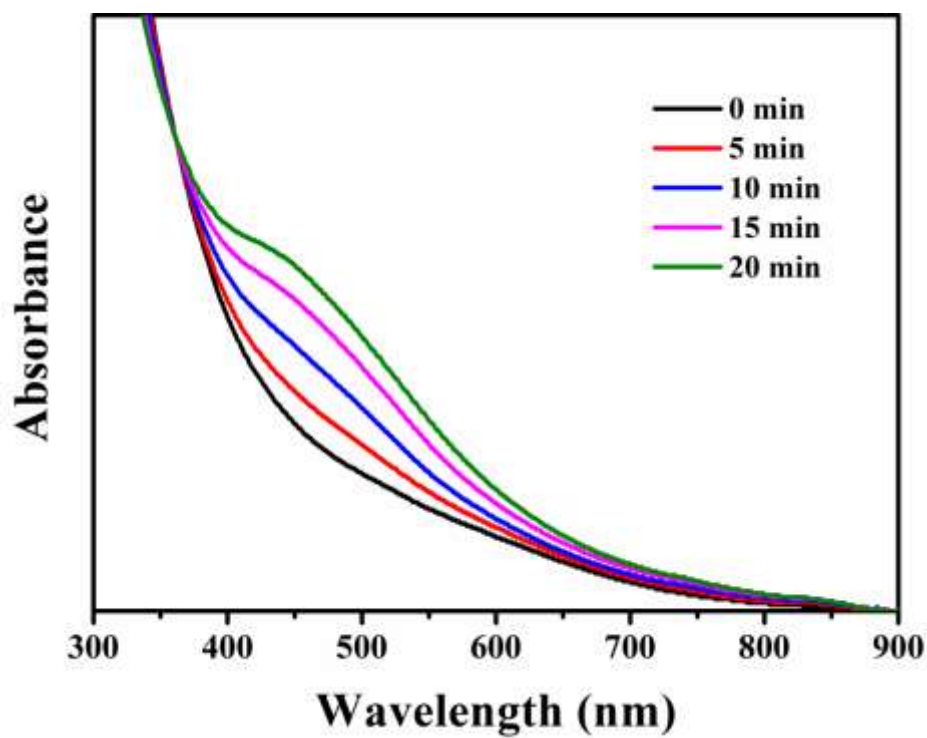

Fig. S19 UV-Vis spectra of HA-CDs + Ag<sup>+</sup> for different irradiation times by a 650-nm

(1 W cm<sup>-2</sup>) laser.

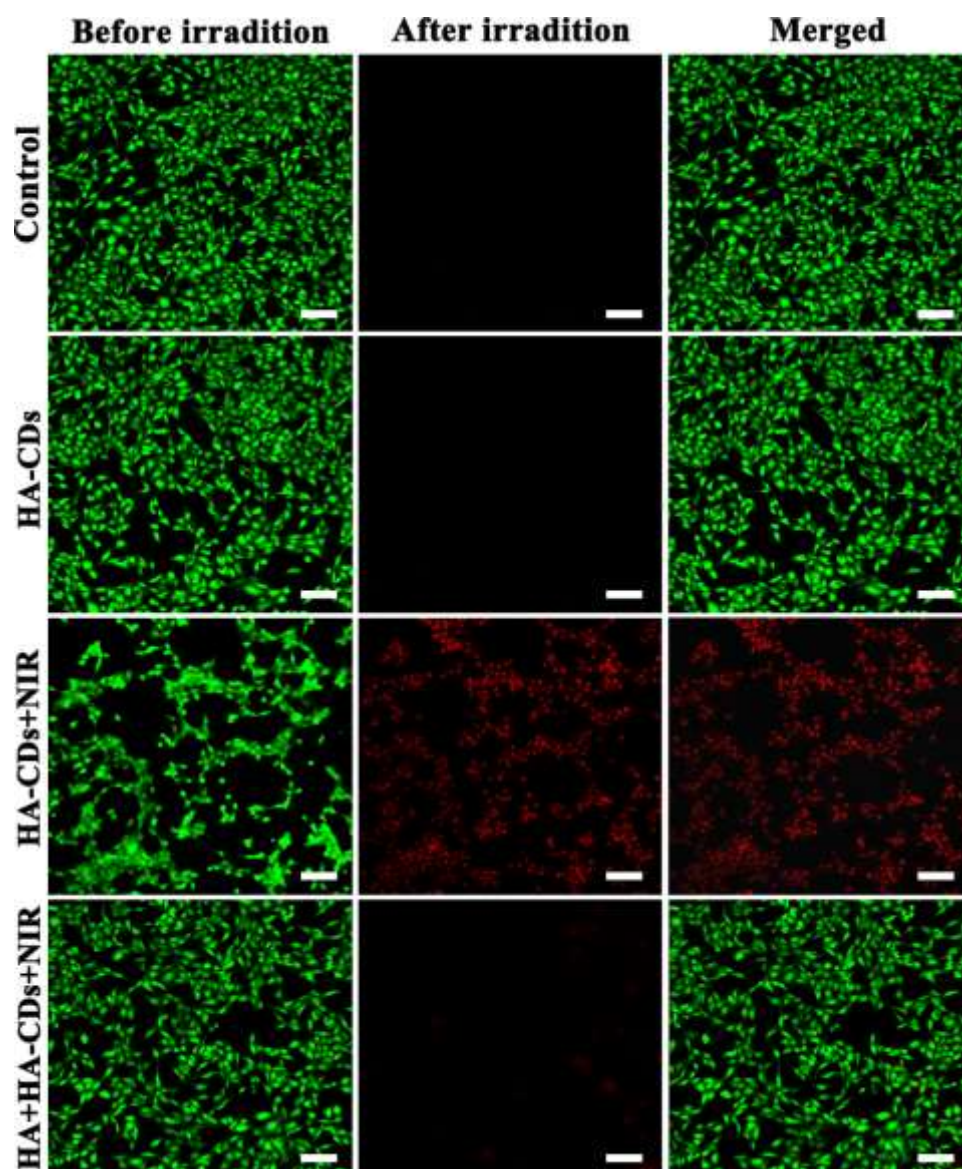

**Fig. S20** Confocal microscopy images of 4T1 cells stained with calcein-AM (green, living cells) and PI (red, dead cells) after treatment with PBS and HA-CDs with or without free HA blocked, respectively. These images were taken before and after irradiation with a 650-nm laser (1.0 W cm<sup>-2</sup>, 10 min). Scale bar: 100  $\mu$ m.



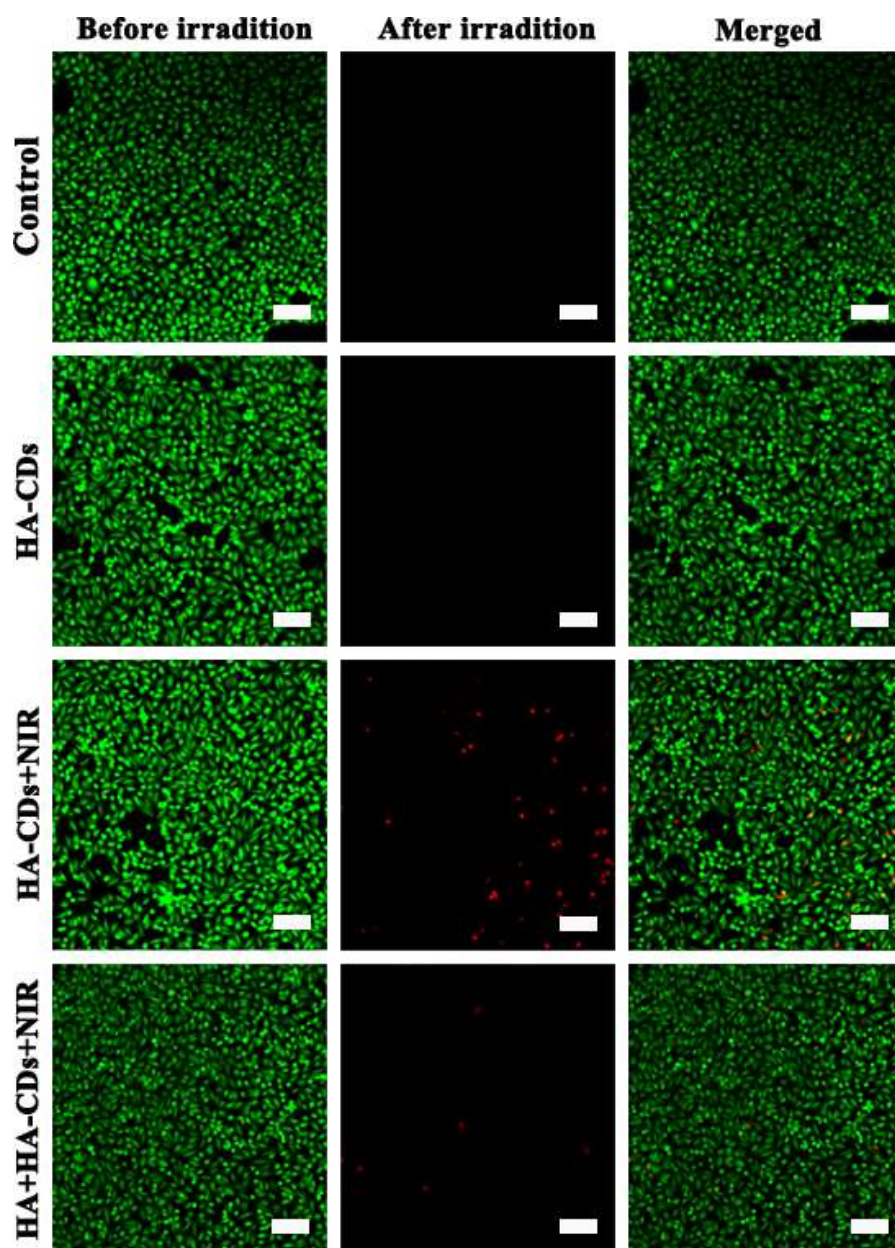

**Fig. S21** Confocal microscopy images of L929 cells stained with calcein-AM (green, living cells) and PI (red, dead cells) after treatment with PBS and HA-CDs with or without free HA blocked, respectively. These images were taken before and after irradiation with a 650-nm laser ( $1.0 \text{ W cm}^{-2}$ , 10 min). Scale bar: 100  $\mu\text{m}$ .
